# Supplementary material
Source: PubMed Central journal article supplement (PMC4560667)
Supplement: NIHMS692972-supplement-supplemental.pdf [file NIHMS692972-supplement-supplemental.pdf]

**Supplemental File****Supplemental Table 1: Read Codes for Alzheimer's Disease Case Definition**

| <b>Read Code</b> | <b>Description</b>                                           |
|------------------|--------------------------------------------------------------|
| F110.00          | Alzheimer's disease                                          |
| Eu00.00          | [X]Dementia in Alzheimer's disease                           |
| Eu00z11          | [X]Alzheimer's dementia unspec                               |
| Eu00112          | [X]Senile dementia,Alzheimer's type                          |
| Eu00200          | [X]Dementia in Alzheimer's dis, atypical or mixed type       |
| Eu00z00          | [X]Dementia in Alzheimer's disease, unspecified              |
| F110000          | Alzheimer's disease with early onset                         |
| F110100          | Alzheimer's disease with late onset                          |
| Eu00100          | [X]Dementia in Alzheimer's disease with late onset           |
| Eu00000          | [X]Dementia in Alzheimer's disease with early onset          |
| ZR1K.00          | Alzheimer's disease assessment scale                         |
| ZR1K.11          | ADAS - Alzheimer's disease assessment scale                  |
| 13Y7.00          | Alzheimer's disease society member                           |
| Eu00113          | [X]Primary degen dementia of Alzheimer's type, senile onset  |
| Eu00011          | [X]Presenile dementia,Alzheimer's type                       |
| Eu00111          | [X]Alzheimer's disease type 1                                |
| Eu00013          | [X]Alzheimer's disease type 2                                |
| Eu00012          | [X]Primary degen dementia, Alzheimer's type, presenile onset |
| Fyu3000          | [X]Other Alzheimer's disease                                 |

**Supplemental Table 2. Incidence Rates and Hazard Ratios (HR) for and Alzheimer's disease by Gout Status Using an Alternative Definition, according to subgroups**

|                                                 | Gout Status | N      | Cases | Follow-up Time (person-years) | Mean Follow-up (years) | Incidence Rate (cases per 1000 person-years) | Age, Sex, Entry-time, and BMI-Matched HR (95%CI) <sup>*</sup> | + GPs visits, continuous BMI, Smoking, and Alcohol Adjusted HR (95%CI) | + Comorbidity and CVD Drug Adjusted HR <sup>*</sup> (95%CI) |
|-------------------------------------------------|-------------|--------|-------|-------------------------------|------------------------|----------------------------------------------|---------------------------------------------------------------|------------------------------------------------------------------------|-------------------------------------------------------------|
| <b>Total</b>                                    | <b>Yes</b>  | 31799  | 145   | 171054.1                      | 5.4                    | 0.8 (0.7 to 1.0)                             | 0.58 (0.48 to 0.70)                                           | 0.58 (0.48 to 0.70)                                                    | 0.64 (0.53 to 0.78)                                         |
|                                                 | <b>No</b>   | 128024 | 1062  | 691982.6                      | 5.4                    | 1.5 (1.4 to 1.6)                             | 1.0 (reference)                                               | 1.0 (reference)                                                        | 1.0 (reference)                                             |
| <b>Female</b>                                   | <b>Yes</b>  | 9099   | 57    | 44849.9                       | 4.9                    | 1.3 (1.0 to 1.6)                             | 0.52 (0.38 to 0.69)                                           | 0.55 (0.40 to 0.74)                                                    | 0.60 (0.44 to 0.82)                                         |
|                                                 | <b>No</b>   | 36088  | 487   | 185475.1                      | 5.1                    | 2.6 (2.4 to 2.9)                             | 1.0 (reference)                                               | 1.0 (reference)                                                        | 1.0 (reference)                                             |
| <b>Male</b>                                     | <b>Yes</b>  | 22700  | 88    | 126204.3                      | 5.6                    | 0.7 (0.6 to 0.9)                             | 0.63 (0.49 to 0.80)                                           | 0.61 (0.48 to 0.78)                                                    | 0.68 (0.53 to 0.88)                                         |
|                                                 | <b>No</b>   | 91936  | 575   | 506507.5                      | 5.5                    | 1.1 (1.0 to 1.2)                             | 1.0 (reference)                                               | 1.0 (reference)                                                        | 1.0 (reference)                                             |
| <b>&lt;75 years</b>                             | <b>Yes</b>  | 23456  | 71    | 139022.5                      | 5.9                    | 0.5 (0.4 to 0.6)                             | 0.67 (0.51 to 0.88)                                           | 0.66 (0.51 to 0.87)                                                    | 0.72 (0.54 to 0.96)                                         |
|                                                 | <b>No</b>   | 94988  | 473   | 560341.4                      | 5.9                    | 0.8 (0.8 to 0.9)                             | 1.0 (reference)                                               | 1.0 (reference)                                                        | 1.0 (reference)                                             |
| <b>75-90 years</b>                              | <b>Yes</b>  | 8343   | 74    | 32031.7                       | 3.8                    | 2.3 (1.8 to 2.9)                             | 0.51 (0.39 to 0.66)                                           | 0.51 (0.39 to 0.67)                                                    | 0.57 (0.43 to 0.75)                                         |
|                                                 | <b>No</b>   | 33036  | 589   | 131641.2                      | 4.0                    | 4.5 (4.1 to 4.9)                             | 1.0 (reference)                                               | 1.0 (reference)                                                        | 1.0 (reference)                                             |
| <b>High Socio-Economic Depravity (SDI&gt;2)</b> | <b>Yes</b>  | 12715  | 56    | 68107.6                       | 5.4                    | 0.8 (0.6 to 1.1)                             | 0.52 (0.35 to 0.76)                                           | 0.56 (0.40 to 0.78)                                                    | 0.60 (0.42 to 0.84)                                         |
|                                                 | <b>No</b>   | 49783  | 456   | 269689.0                      | 5.4                    | 1.7 (1.5 to 1.9)                             | 1.0 (reference)                                               | 1.0 (reference)                                                        | 1.0 (reference)                                             |
| <b>Low Socio-Economic Depravity (SDI≤2)</b>     | <b>Yes</b>  | 19084  | 89    | 102946.6                      | 5.4                    | 0.9 (0.7 to 1.1)                             | 0.62 (0.47 to 0.80)                                           | 0.59 (0.42 to 0.82)                                                    | 0.67 (0.47 to 0.94)                                         |
|                                                 | <b>No</b>   | 78241  | 606   | 422293.6                      | 5.4                    | 1.4 (1.3 to 1.6)                             | 1.0 (reference)                                               | 1.0 (reference)                                                        | 1.0 (reference)                                             |
| <b>Hypertension</b>                             | <b>Yes</b>  | 19062  | 96    | 96699.5                       | 5.1                    | 1.0 (0.8 to 1.2)                             | 0.62 (0.48 to 0.80)                                           | 0.63 (0.48 to 0.82)                                                    | 0.63 (0.48 to 0.84)                                         |
|                                                 | <b>No</b>   | 56481  | 514   | 277730.7                      | 4.9                    | 1.9 (1.7 to 2.0)                             | 1.0 (reference)                                               | 1.0 (reference)                                                        | 1.0 (reference)                                             |
| <b>No Hypertension</b>                          | <b>Yes</b>  | 12737  | 49    | 74354.6                       | 5.8                    | 0.7 (0.5 to 0.9)                             | 0.57 (0.38 to 0.85)                                           | 0.56 (0.38 to 0.85)                                                    | 0.57 (0.38 to 0.87)                                         |
|                                                 | <b>No</b>   | 71543  | 548   | 414251.9                      | 5.8                    | 1.3 (1.2 to 1.4)                             | 1.0 (reference)                                               | 1.0 (reference)                                                        | 1.0 (reference)                                             |
| <b>Hyperlipidemia</b>                           | <b>Yes</b>  | 14149  | 66    | 63187.4                       | 4.5                    | 1.0 (0.8 to 1.3)                             | 0.58 (0.41 to 0.81)                                           | 0.53 (0.37 to 0.75)                                                    | 0.56 (0.39 to 0.82)                                         |
|                                                 | <b>No</b>   | 44697  | 357   | 196501.3                      | 4.4                    | 1.8 (1.6 to 2.0)                             | 1.0 (reference)                                               | 1.0 (reference)                                                        | 1.0 (reference)                                             |
| <b>No Hyperlipidemia</b>                        | <b>Yes</b>  | 17650  | 79    | 107866.7                      | 6.1                    | 0.7 (0.6 to 0.9)                             | 0.59 (0.45 to 0.78)                                           | 0.60 (0.45 to 0.78)                                                    | 0.68 (0.51 to 0.91)                                         |
|                                                 | <b>No</b>   | 83327  | 705   | 495481.3                      | 5.9                    | 1.4 (1.3 to 1.5)                             | 1.0 (reference)                                               | 1.0 (reference)                                                        | 1.0 (reference)                                             |
| <b>CVD</b>                                      | <b>Yes</b>  | 9647   | 48    | 45686.3                       | 4.7                    | 1.1 (0.8 to 1.4)                             | 0.50 (0.33 to 0.77)                                           | 0.42 (0.26 to 0.67)                                                    | 0.51 (0.30 to 0.85)                                         |
|                                                 | <b>No</b>   | 27540  | 282   | 134444.4                      | 4.9                    | 2.1 (1.9 to 2.4)                             | 1.0 (reference)                                               | 1.0 (reference)                                                        | 1.0 (reference)                                             |
| <b>No CVD</b>                                   | <b>Yes</b>  | 22152  | 97    | 125367.8                      | 5.7                    | 0.8 (0.6 to 0.9)                             | 0.61 (0.48 to 0.79)                                           | 0.61 (0.48 to 0.79)                                                    | 0.66 (0.50 to 0.85)                                         |
|                                                 | <b>No</b>   | 100484 | 780   | 557538.2                      | 5.5                    | 1.4 (1.3 to 1.5)                             | 1.0 (reference)                                               | 1.0 (reference)                                                        | 1.0 (reference)                                             |

\*Adjusted for the covariates in Table 1, except for the sub-group variables
